# Supplementary material for: Oncolytic Viruses for Canine Cancer Treatment
Source: PubMed Central journal article supplement (PMC6266482; doi:10.3390/cancers10110404), 2018-10-27
Supplement: cancers-10-00404-s001.pdf [file cancers-10-00404-s001.pdf]

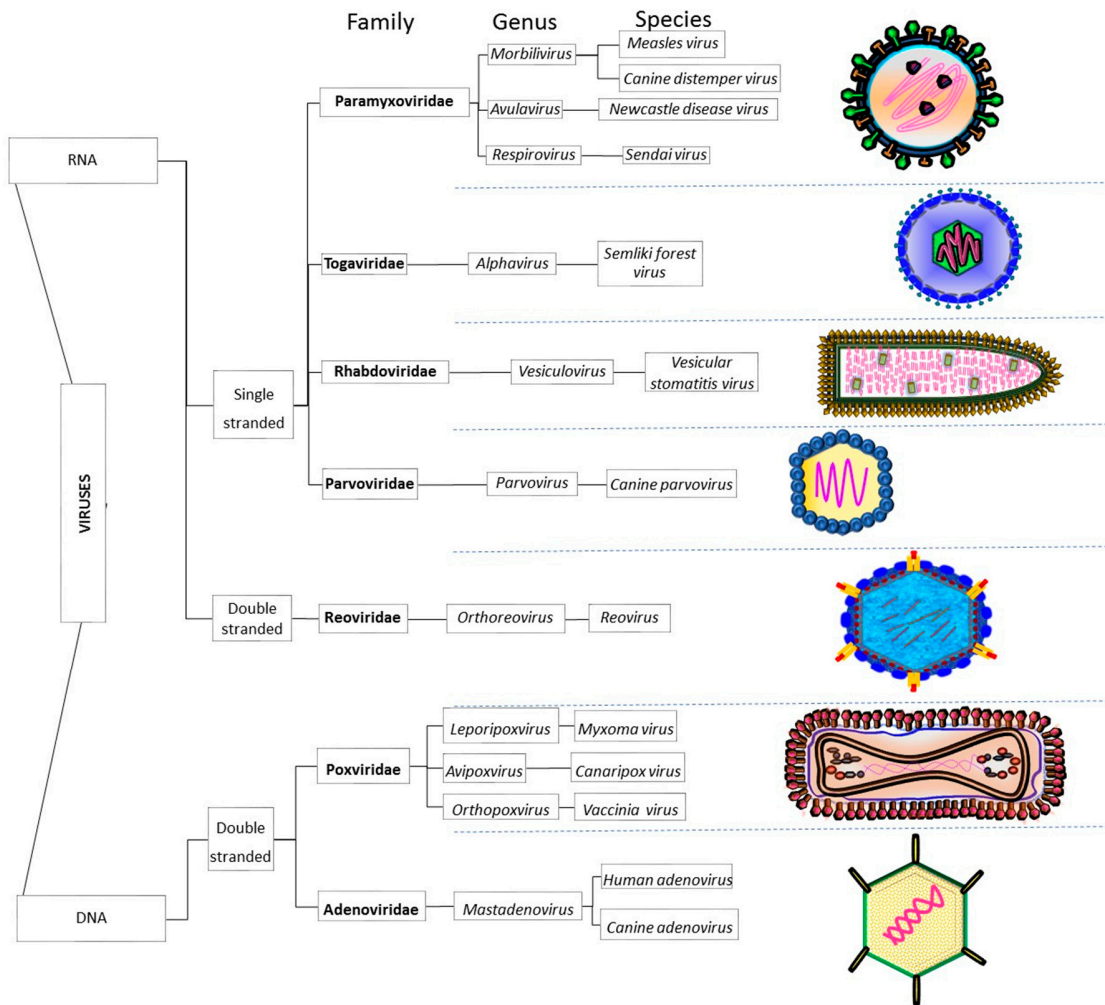

**Supplementary Figure S1.** Oncolytic viruses studied in dogs. The figure shows the different viruses that have been studied as oncolytics either *in vitro* or *in vivo* in dogs. Viruses are grouped according to their genus, family and type of nucleic acid. Representative virion structures for each viral family are shown.
